# Supplementary material for: Systematic tuning of pore morphologies and pore volumes in macroporous materials by freezing
Source: Royal Society of Chemistry journal article supplement (doi:10.1039/b903461g), 2009-01-01
Supplement: b903461g.pdf [file b903461g.pdf]

# Systematic tuning of pore morphologies and pore volumes in macroporous materials by freezing

*Lei Qian,<sup>†</sup> Adham Ahmed,<sup>†</sup> Alison Foster,<sup>‡</sup> Steve P. Rannard,<sup>†,‡</sup> Andrew I. Cooper,<sup>†</sup> and  
Haifei Zhang<sup>\*,†</sup>*

<sup>†</sup>Department of Chemistry, University of Liverpool, Crown Street, Liverpool, L69 3BX, United Kingdom, <sup>‡</sup>IOTA NanoSolutions Ltd., MerseyBio, Crown Street, Liverpool, L69 7ZB, United Kingdom.  
Email: zhanghf@liv.ac.uk

## Electronic Supporting Information

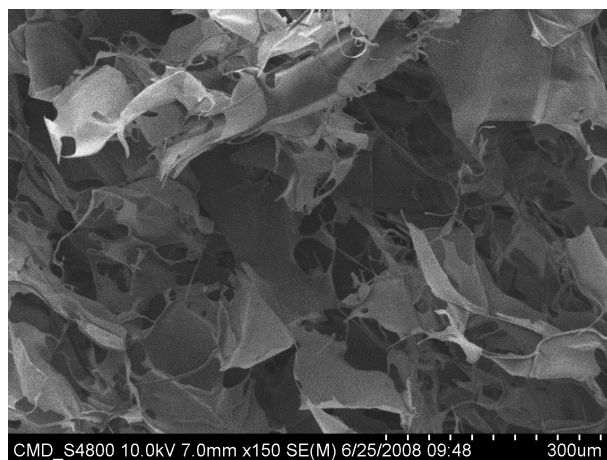

**Fig. S1** The random porous structure of SCMC by freezing a 1wt % SCMC aqueous solution in a freezer and then freeze drying.

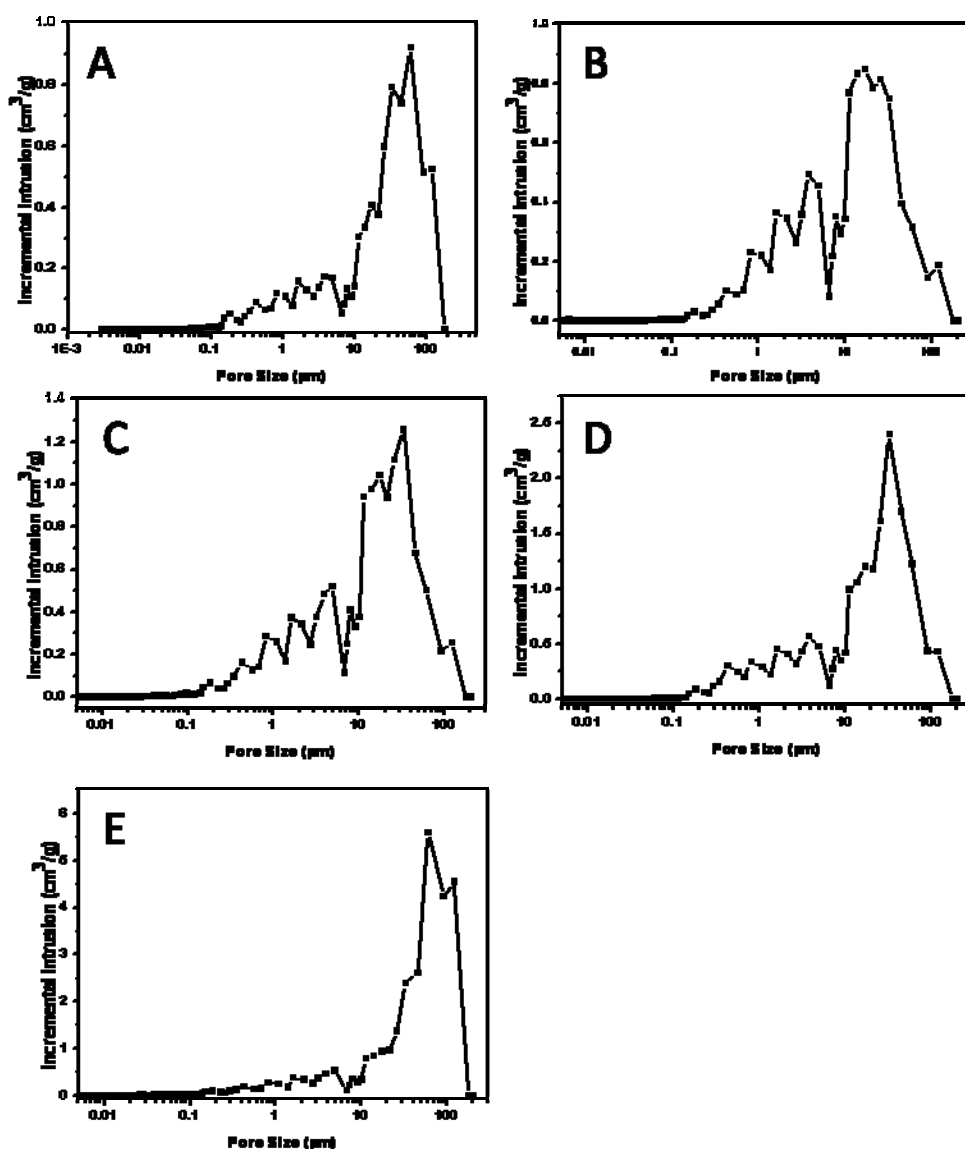

**Fig. S2** Pore size distribution of emulsion-templated porous SCMC as measured by mercury intrusion porosimetry at different volume percentage of internal phase in the emulsions. (A) 0 v/v %. (B) 20 v/v %. (C) 40 v/v %. (D) 60 v/v %. (E) 75 v/v %.

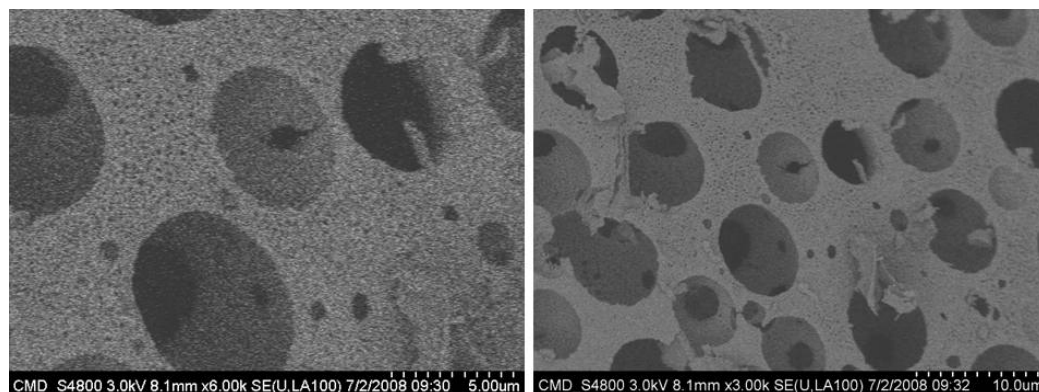

**Fig. S3** The porous surface of silica beads calcined from PVA-HS30 beads.

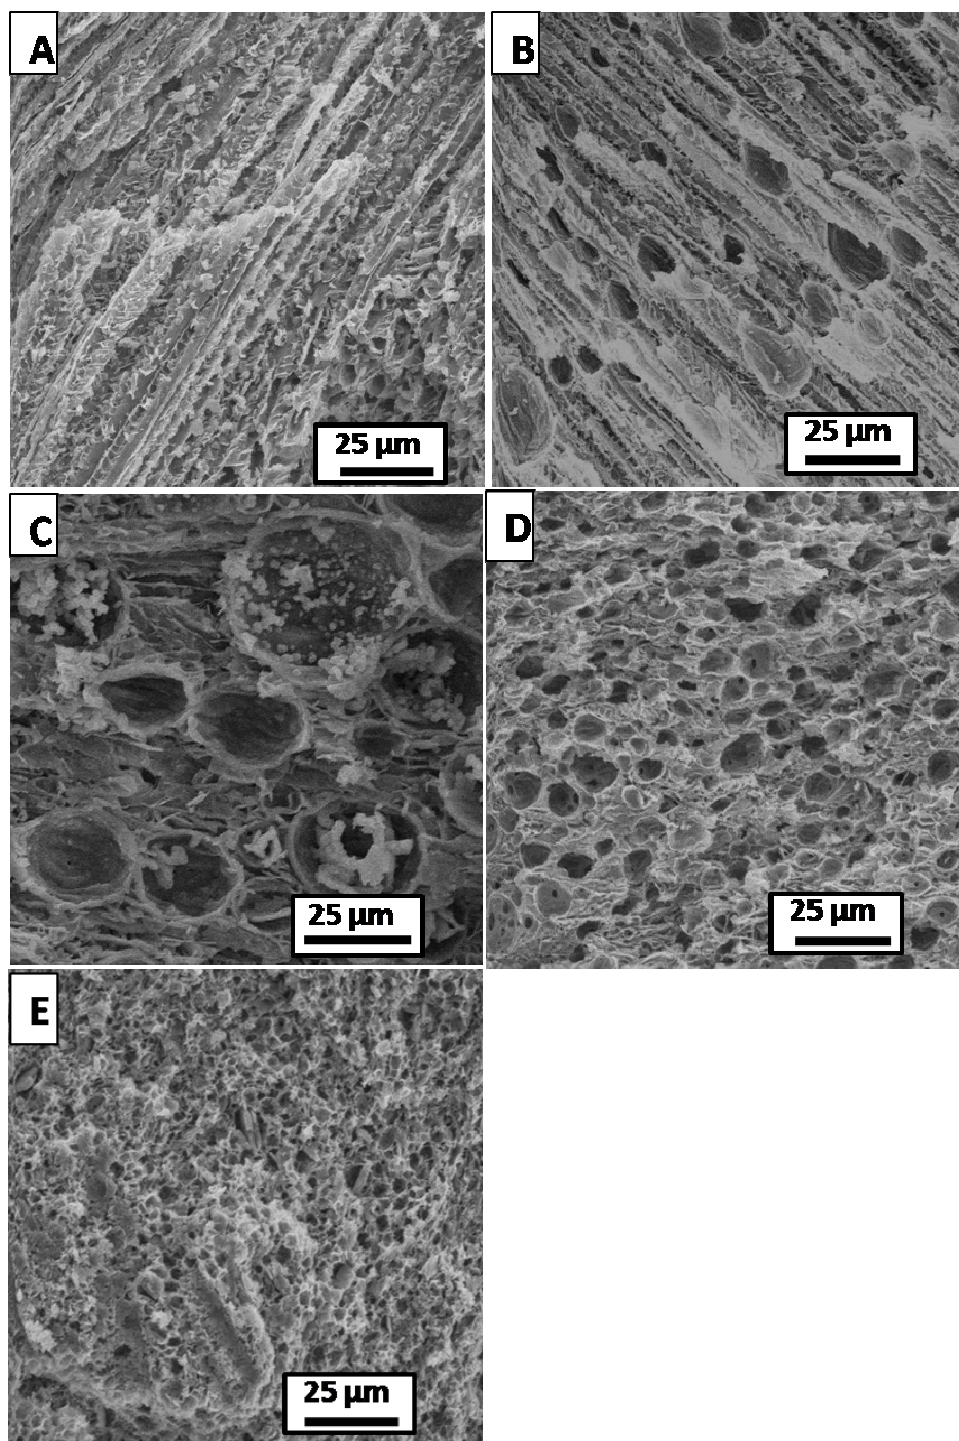

**Fig. S4 Porous zirconia/PVA composites with tuned pore morphology and porosity, prepared from emulsion-templated PVA beads. (A) 0 v/v %. (B) 20 v/v. (C) 40 v/v %. (D) 60 v/v. (E) 75 %.**
